# Supplementary material for: Peltaster fructicola genome reveals evolution from an invasive phytopathogen to an ectophytic parasite
Source: PubMed Central journal article supplement (PMC4786788; doi:10.1038/srep22926), 2016-03-11
Supplement: srep22926-s1.pdf [file srep22926-s1.pdf]

1 **Supplementary Information**

2

3

4 ***Peltaster fructicola* genome reveals evolution from an invasive phytopathogen to**  
5 **an ectophytic parasite**

6

7 Chao Xu<sup>1</sup>, Huan Chen<sup>1</sup>, Mark L. Gleason<sup>2</sup>, Jin-Rong Xu<sup>1,3</sup>, Huiquan Liu<sup>1</sup>, Rong Zhang<sup>1</sup> &  
8 Guangyu Sun<sup>1\*</sup>

9

10 <sup>1</sup>State Key Laboratory of Crop Stress Biology in Arid Areas and College of Plant Protection,  
11 Northwest A&F University, Yangling, Shaanxi 712100, China

12 <sup>2</sup>Department of Plant Pathology and Microbiology, Iowa State University, Ames, Iowa 50011,  
13 USA

14 <sup>3</sup>Department of Botany and Plant Pathology, Purdue University, West Lafayette, Indiana 47907,  
15 USA

16

17 \*Corresponding author: e-mail: sgy@nwsuaf.edu.cn; Tel: 086-029-87092075

18

19

20

21

22

23

24

25

26

27

28

29

30

31

32

33

34

35

36

37

38

39

40

41

42

1 **Supplementary Figures**

2

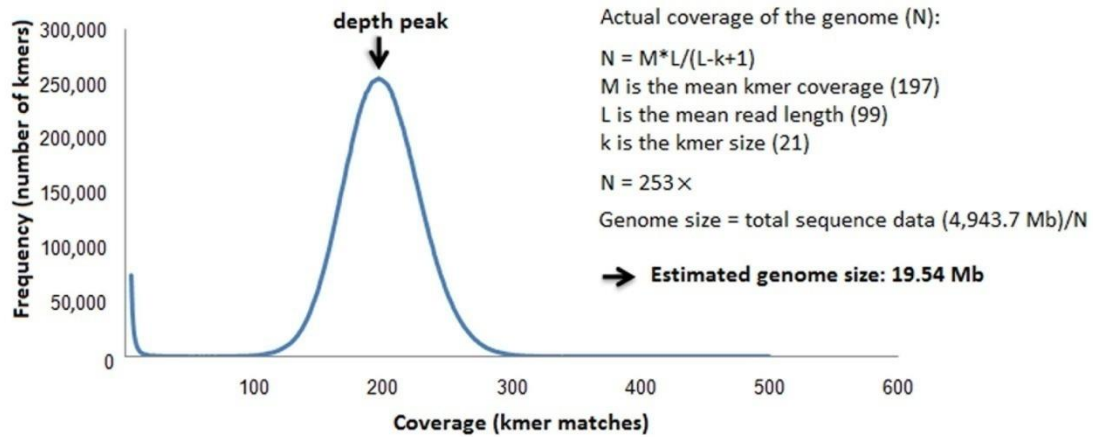

3

4 **Supplementary Figure 1. Distribution of 21-mer frequency in the raw Illumina genomic**  
5 **reads of *P. fruticola*.** The peak depth is at 197X. The peak of 21-mer frequency (M) in reads is  
6 correlated with the real sequencing depth (N), read length (L), and kmer length (K); their  
7 relationships can be expressed in the experienced formula:  $M = N * (L - K + 1) / L$ . We then  
8 divided the total sequence length by the real sequencing depth and obtained an estimated genome  
9 size of 19.54 Mb.

10

11

12

13

14

15

16

17

18

19

20

21

22

23

24

25

26

27

28

29

30

31

32

33

1

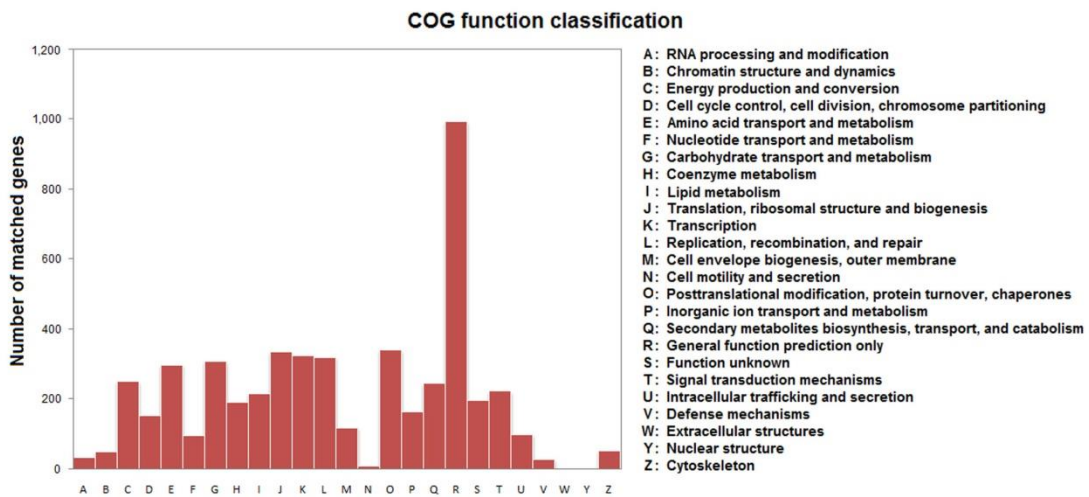

2

3 **Supplementary Figure S2. Distribution of COG function annotation of the *P. fructicola***  
4 **genome. In total, there are 3,856 genes (46.3%) that have functional assignments.**

5

6

7

8

9

10

11

12

13

14

15

16

17

18

19

20

21

22

23

24

25

26

27

28

29

30

31

32

1

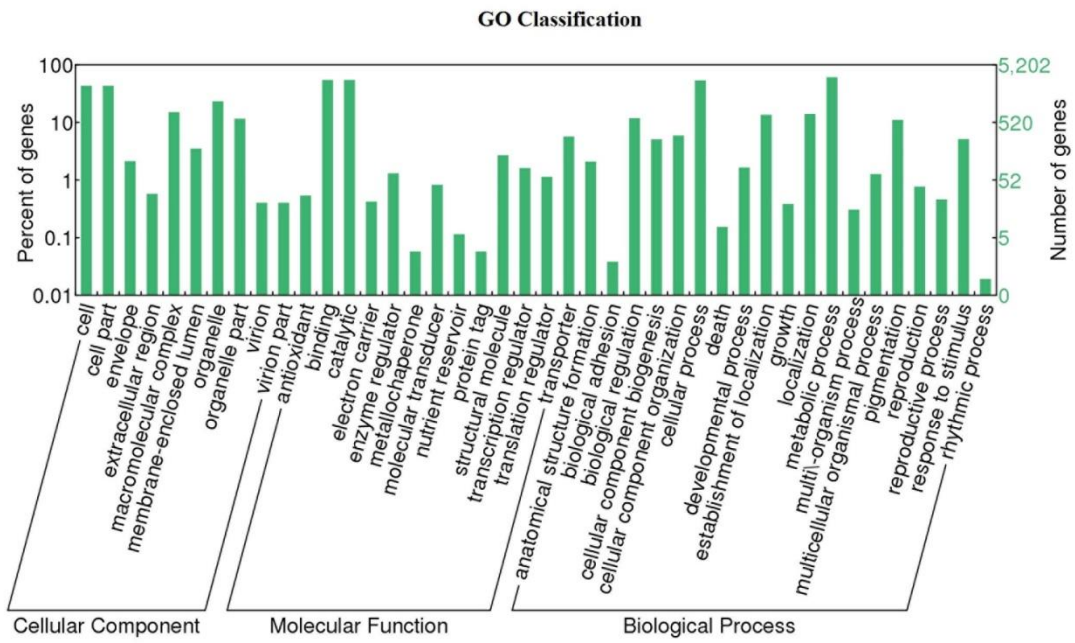

2

3

**Supplementary Figure S3. GO functional classification of the *P. fructicola* genome.** In total, there are 5202 genes (62.4%) that have functional assignments.

4

5

6

7

8

9

10

11

12

13

14

15

16

17

18

19

20

21

22

23

24

25

26

27

28

29

1

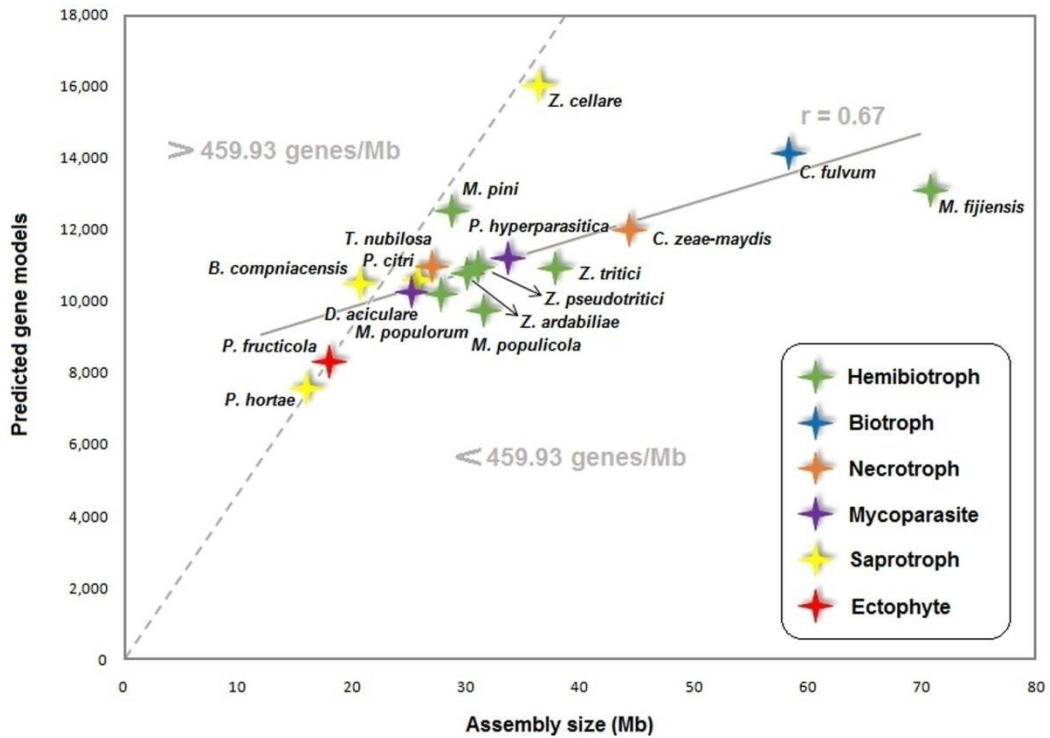

2

3 **Supplementary Figure S4. Distribution of total gene contents and assembly sizes of**  
4 **sequenced fungi with various lifestyles in Capnodiales.** The dashed line discriminates between  
5 fungi that have larger and smaller gene densities than *P. fructicola* (459.93 genes/Mb). The solid  
6 line indicates the linear trend with the linear correlation coefficient  $r$  (0.67). Hemibiotrophs:  
7 *Dothistroma septosporum*, *Mycosphaerella fijiensis*, *Zymoseptoria tritici*, *Mycosphaerella*  
8 *populorum*, *Mycosphaerella populicola*, *Zymoseptoria ardabiliae*, *Zymoseptoria pseudotritici*.  
9 Biotroph: *Cladosporium fulvum*. Necrotrophs: *Cercospora zeae-maydis*, *Teratosphaeria nubilosa*.  
10 Mycoparasites: *Dissoconium aciculare*, *Pseudovirgaria hyperparasitica*. Saprotrophs: *Baudoinia*  
11 *compniacensis*, *Piedraia hortae*, *Polychaeton citri*, *Zasmidium cellare*. Ectophyte: *Peltaster*  
12 *fructicola*.

13

14

15

16

17

18

19

20

21

22

23

24

25

1

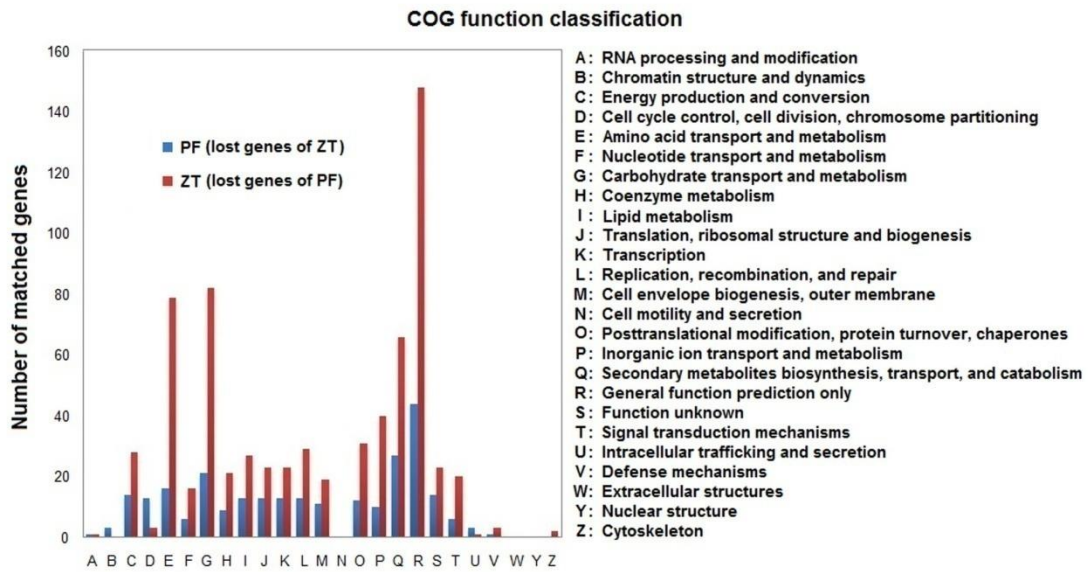

2

3 **Supplementary Figure S5. Distribution of COG function annotation of the lost genes in *P.***  
4 ***fruticola* and *Z. tritici*.** In total, 215 genes (38.4%) and 527 genes (45.9%) were annotated in *P.*  
5 *fruticola* (PF) and *Z. tritici* (ZT), respectively.

6

7

8

9

10

11

12

13

14

15

16

17

18

19

20

21

22

23

24

25

26

27

28

29

30

1

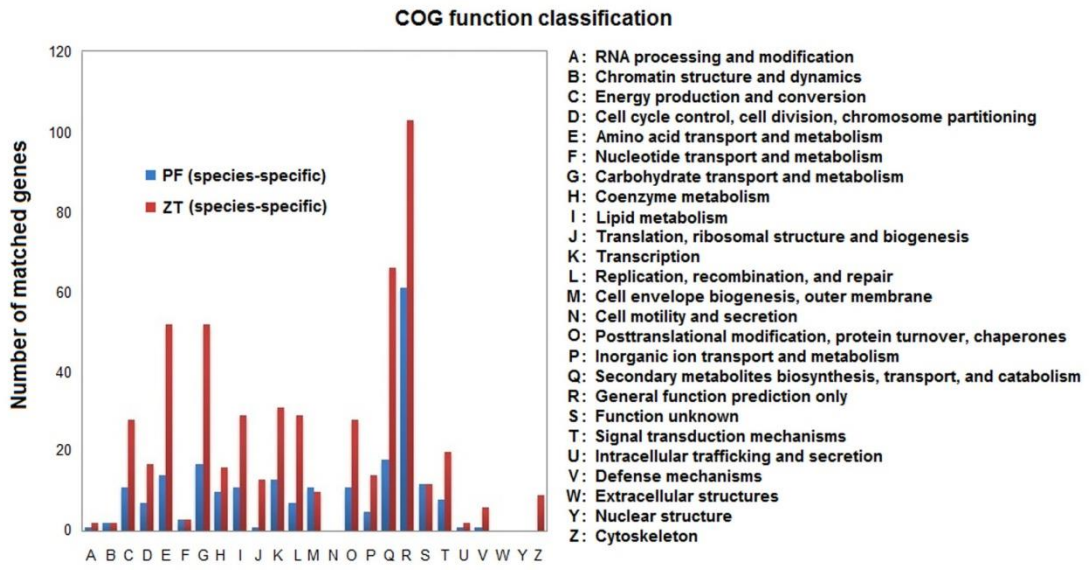

2

3 **Supplementary Figure S6. Distribution of COG function annotation of species-specific genes**  
4 **in *P. fructicola* and *Z. tritici*.** In total, 168 genes (10.3%) and 409 genes (11.7%) were annotated  
5 in *P. fructicola* (PF) and *Z. tritici* (ZT), respectively.

6

7

8

9

10

11

12

13

14

15

16

17

18

19

20

21

22

23

24

25

26

27

28

29

30

1

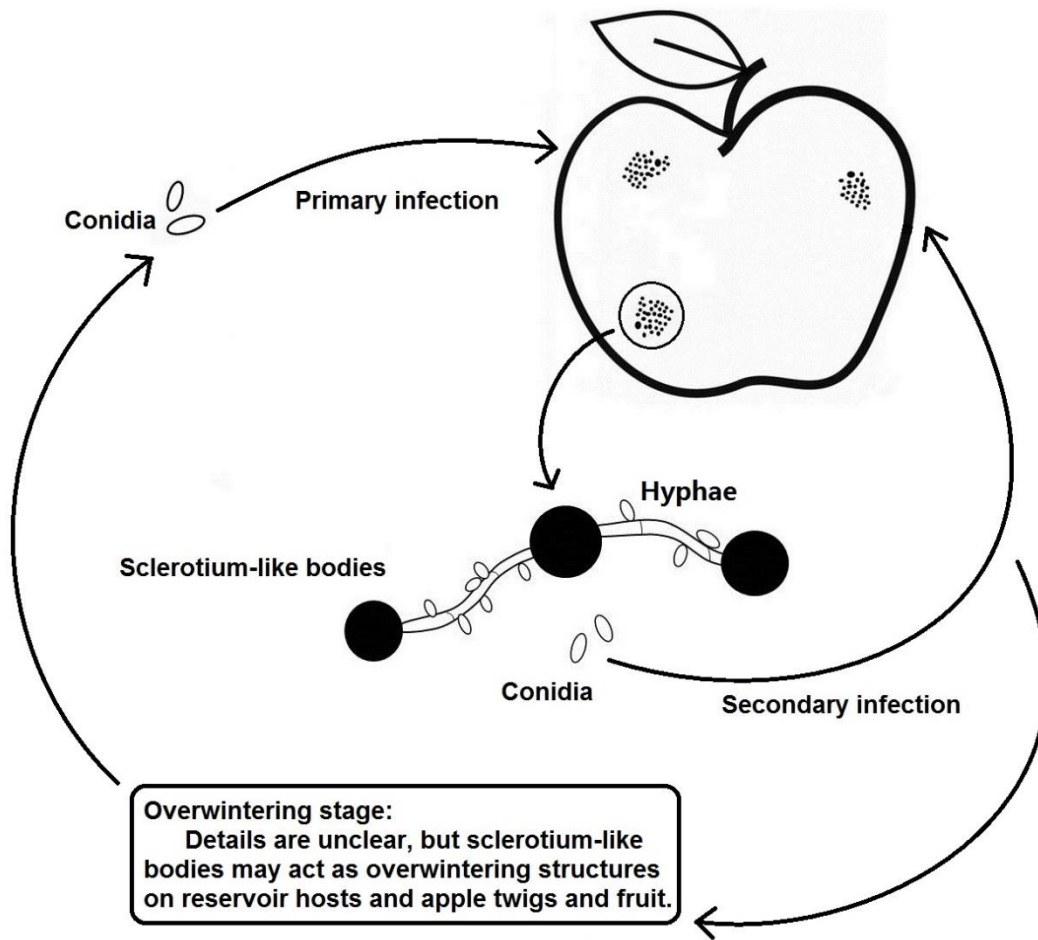

2

3 **Supplementary Figure S7. The life cycle of *P. fructicola*.** In this diagram, only the asexual stage  
4 of *P. fructicola* is described because its sexual stage has not been found in either nature or culture.

5

6

7

8

9

10

11

12

13

14

15

16

17

18

19

20

21



1 **Supplementary Tables**

2

3 **Supplementary Table S1. Up-regulated and/or highly expressed secreted protein-coding**  
 4 **genes *in vivo* in *P. fructicola*.**

| Gene ID    | Pfam annotation                                                            | E-value | Nr annotation                                 | E-value | Expression <i>in vivo</i> <sup>1</sup> |
|------------|----------------------------------------------------------------------------|---------|-----------------------------------------------|---------|----------------------------------------|
| Pelfr_1250 | Glyco_hydro_30 (PF02055)                                                   | 5.4e-29 | Beta-1,6-glucanase                            | 3e-177  | Up-regulated & highly expressed        |
| Pelfr_1126 | COesterase (PF00135)                                                       | 6.7e-74 | Carboxylesterase type B                       | 0.0     | Up-regulated & highly expressed        |
| Pelfr_6771 | Metallophos (PF00149)                                                      | 5.8e-29 | Acid phosphatase AphA                         | 0.0     | Up-regulated & highly expressed        |
| Pelfr_3889 | Metallophos (PF00149)                                                      | 4.6e-07 | Metallo-phosphoesterase                       | 0.0     | Up-regulated                           |
| Pelfr_4114 | Phosphoesterase (PF04185)                                                  | 9.5e-70 | Phospholipase C                               | 0.0     | Up-regulated                           |
| Pelfr_5583 | GDPD (PF03009)                                                             | 6.6e-07 | Glycerophosphoryl diester phosphodiesterase   | 0.0     | Up-regulated                           |
| Pelfr_3400 | Peroxidase_2 (PF01328)                                                     | 3.2e-13 | Cloroperoxidase                               | 0.0     | Up-regulated                           |
| Pelfr_2011 | FAD_binding_4 (PF01565)                                                    | 2.5e-25 | Secreted FAD-dependent oxidoreductase         | 4e-96   | Up-regulated                           |
| Pelfr_5553 | Tyrosinase (PF00264)                                                       | 1.5e-49 | Tyrosinase                                    | 4e-135  | Up-regulated                           |
| Pelfr_2833 | Arginase (PF00491)                                                         | 4.2e-83 | Arginase/deacetylase                          | 0.0     | Up-regulated                           |
| Pelfr_4025 | Cu-oxidase (PF00394);<br>Cu-oxidase_2 (PF07731);<br>Cu-oxidase_3 (PF07732) | 1.1e-44 | Multicopper oxidase type 1                    | 0.0     | Up-regulated & highly expressed        |
| Pelfr_4790 | S1-P1_nuclease (PF02265)                                                   | 3.2e-96 | Nuclease PA3                                  | 2e-144  | Up-regulated & highly expressed        |
| Pelfr_1369 | -                                                                          | -       | Hypothetical protein                          | 4e-57   | Up-regulated                           |
| Pelfr_2143 | DUF1996 (PF09362)                                                          | 1.2e-59 | WSC domain-containing protein                 | 1e-70   | Up-regulated                           |
| Pelfr_7312 | -                                                                          | -       | Hypothetical protein                          | 1e-24   | Up-regulated & highly expressed        |
| Pelfr_7724 | -                                                                          | -       | Hypothetical protein                          | 1e-10   | Up-regulated & highly expressed        |
| Pelfr_3633 | Glyco_hydro_17 (PF00332)                                                   | 6.6e-33 | Exo-beta-1,3-glucanase                        | 1e-140  | Highly expressed                       |
| Pelfr_1460 | Peptidase_M28 (PF04389)                                                    | 1.9e-29 | Zinc-metallopeptidase                         | 0.0     | Highly expressed                       |
| Pelfr_0316 | FKBP_C (PF00254)                                                           | 2.3e-41 | FKBP-type peptidyl-prolyl cis-trans isomerase | 5e-60   | Highly expressed                       |

5

6 <sup>1</sup>Up-regulated: expression quantity (RPKM) of *in vivo* is more than that of *in vitro* (>=2-fold); Highly expressed:  
 7 expression quantity (RPKM) of *in vivo* is more than 80.

8 Note: *in vivo* refers to *P. fructicola* infecting apple fruit about 1 month after inoculation; *In vitro* refers to *P.*  
 9 *fructicola* growing on PDA at 22 °C for 15 days; RPKM, reads per kilobase per million mapped reads.

10

11

12

1 **Supplementary Table S2. Secreted peptidases in *P. fructicola*.**

| Gene ID    | Pfam annotation          | E-value  | Nr annotation               | E-value | MEROPS annotation                          | E-value  |
|------------|--------------------------|----------|-----------------------------|---------|--------------------------------------------|----------|
| Pelfr_5071 | Asp (PF00026)            | 2.6e-33  | Aspartic-type endopeptidase | 9e-73   | PepAc peptidase, subfamily A1A             | 4.5e-76  |
| Pelfr_3148 | Asp (PF00026)            | 2.0e-52  | Aspartic-type endopeptidase | 8e-77   | PepAc peptidase, subfamily A1A             | 8.7e-96  |
| Pelfr_4918 | Pro-kuma_activ (PF09286) | 1.2e-46  | Tripeptidyl-peptidase       | 0.0     | Grifolisin, subfamily S53                  | 3.6e-113 |
| Pelfr_1460 | Peptidase_M28 (PF04389)  | 1.9e-29  | Zinc-metallopeptidase       | 0.0     | Mername-AA063 peptidase, subfamily M28E    | 2.6e-110 |
| Pelfr_7574 | Peptidase_S8 (PF00082)   | 1.2e-26  | Subtilisin-like protein     | 5e-37   | Subtilisin-like peptidase 3, subfamily S8A | 2.3e-26  |
| Pelfr_0800 | Peptidase_S10 (PF00450)  | 3.8e-104 | Serine carboxypeptidase     | 0.0     | Carboxypeptidase OcpB, subfamily S10       | 7.2e-172 |
| Pelfr_6788 | Peptidase_S10 (PF00450)  | 2.03e-82 | Serine carboxypeptidase     | 0.0     | Carboxypeptidase O, subfamily S10          | 1.6e-165 |

2

3

4

5

6

7 **Supplementary Table S3. Small secreted proteins (SSPs) in *P. fructicola*.**

| Gene ID    | Pfam annotation        | E-value | Nr annotation                                 | E-value | Cysteine <sup>1</sup> |
|------------|------------------------|---------|-----------------------------------------------|---------|-----------------------|
| Pelfr_0039 | -                      | -       | Putative carbohydrate-binding protein         | 7e-54   | 3.50% (high)          |
| Pelfr_0316 | FKBP_C (PF00254)       | 2.3e-41 | FKBP-type peptidyl-prolyl cis-trans isomerase | 5e-60   | 1.46%                 |
| Pelfr_1820 | His_Phos_1 (PF00300)   | 1.2e-06 | Phosphoglycerate mutase family protein        | 2e-83   | 2.87% (high)          |
| Pelfr_3420 | -                      | -       | Hypothetical protein                          | 5e-42   | 7.27% (high)          |
| Pelfr_6255 | Ribonuclease (PF00545) | 1.3e-18 | Ribonuclease                                  | 3e-41   | 2.99% (high)          |
| Pelfr_2097 | -                      | -       | Hypothetical protein                          | 4e-25   | 4.32% (high)          |
| Pelfr_7294 | -                      | -       | -                                             | -       | 1.87%                 |
| Pelfr_7319 | -                      | -       | -                                             | -       | 0.00%                 |
| Pelfr_7431 | -                      | -       | -                                             | -       | 0.00%                 |
| Pelfr_7511 | -                      | -       | -                                             | -       | 0.72%                 |
| Pelfr_7794 | CVNH (PF08881)         | 1.3e-07 | Cyanovirin-N                                  | 9e-07   | 5.93% (high)          |
| Pelfr_7907 | -                      | -       | -                                             | -       | 4.55% (high)          |

8

9 <sup>1</sup>Values were labeled "high" when the percentage of cysteine residues in the protein was at least twice as high as  
10 the average percentage of cysteine residues in all predicted proteins of *P. fructicola*.

11

12

13

14

15

1 **Supplementary Table S4. Distribution of putative PCWDEs in selected fungi according to**  
 2 **the CAZy database.**

| <b>Fungi</b>                       | <b>Total</b> | <b>CE5</b> | <b>CE8</b> | <b>PL1</b> | <b>PL2</b> | <b>PL3</b> | <b>PL4</b> | <b>PL9</b> | <b>PL10</b> | <b>PL11</b> | <b>GH1</b> | <b>GH2</b> | <b>GH3</b> | <b>GH5</b> |
|------------------------------------|--------------|------------|------------|------------|------------|------------|------------|------------|-------------|-------------|------------|------------|------------|------------|
| <i>Neurospora crassa</i>           | 87           | 3          | 2          | 1          | 0          | 1          | 1          | 0          | 0           | 0           | 2          | 6          | 10         | 6          |
| <i>Laccaria bicolor</i>            | 61           | 1          | 4          | 0          | 0          | 0          | 0          | 0          | 0           | 0           | 0          | 2          | 2          | 20         |
| <i>Rhizophagus irregularis</i>     | 12           | 1          | 0          | 0          | 0          | 0          | 0          | 0          | 0           | 0           | 0          | 0          | 0          | 3          |
| <i>Rhizopus oryzae</i>             | 61           | 0          | 6          | 0          | 0          | 0          | 0          | 0          | 0           | 0           | 0          | 0          | 6          | 8          |
| <i>Saccharomyces cerevisiae</i>    | 18           | 0          | 0          | 0          | 0          | 0          | 0          | 0          | 0           | 0           | 0          | 0          | 0          | 4          |
| <i>Puccinia graminis</i>           | 97           | 9          | 8          | 2          | 0          | 0          | 0          | 0          | 0           | 0           | 0          | 7          | 2          | 28         |
| <i>Ustilago maydis</i>             | 47           | 4          | 1          | 1          | 0          | 0          | 0          | 0          | 0           | 0           | 0          | 1          | 3          | 13         |
| <i>Botrytis cinerea</i>            | 138          | 12         | 5          | 7          | 0          | 2          | 0          | 0          | 0           | 0           | 4          | 2          | 16         | 16         |
| <i>Colletotrichum higginsianum</i> | 226          | 14         | 10         | 16         | 0          | 14         | 6          | 4          | 0           | 0           | 1          | 6          | 22         | 18         |
| <i>Magnaporthe oryzae</i>          | 156          | 19         | 1          | 2          | 0          | 1          | 1          | 0          | 0           | 0           | 2          | 8          | 18         | 13         |
| <i>Zymoseptoria tritici</i>        | 90           | 6          | 1          | 2          | 0          | 1          | 0          | 0          | 0           | 0           | 2          | 8          | 16         | 9          |
| <i>Peltaster fructicola</i>        | 38           | 6          | 0          | 0          | 0          | 0          | 0          | 0          | 0           | 0           | 1          | 2          | 8          | 7          |

  

| <b>Fungi</b>                       | <b>GH6</b> | <b>GH7</b> | <b>GH9</b> | <b>GH10</b> | <b>GH11</b> | <b>GH12</b> | <b>GH26</b> | <b>GH27</b> | <b>GH28</b> | <b>GH29</b> | <b>GH31</b> | <b>GH35</b> | <b>GH36</b> | <b>GH43</b> |
|------------------------------------|------------|------------|------------|-------------|-------------|-------------|-------------|-------------|-------------|-------------|-------------|-------------|-------------|-------------|
| <i>Neurospora crassa</i>           | 3          | 5          | 1          | 4           | 2           | 2           | 1           | 0           | 2           | 0           | 6           | 2           | 0           | 7           |
| <i>Laccaria bicolor</i>            | 0          | 0          | 1          | 0           | 0           | 3           | 0           | 1           | 6           | 0           | 4           | 1           | 0           | 0           |
| <i>Rhizophagus irregularis</i>     | 0          | 0          | 2          | 0           | 0           | 0           | 1           | 0           | 0           | 0           | 2           | 2           | 0           | 0           |
| <i>Rhizopus oryzae</i>             | 0          | 0          | 3          | 0           | 0           | 0           | 1           | 0           | 18          | 0           | 3           | 1           | 1           | 2           |
| <i>Saccharomyces cerevisiae</i>    | 0          | 0          | 0          | 0           | 0           | 0           | 0           | 0           | 1           | 0           | 1           | 0           | 0           | 0           |
| <i>Puccinia graminis</i>           | 0          | 10         | 0          | 5           | 0           | 3           | 6           | 7           | 1           | 0           | 2           | 1           | 0           | 2           |
| <i>Ustilago maydis</i>             | 0          | 0          | 1          | 2           | 1           | 0           | 1           | 1           | 1           | 0           | 3           | 1           | 0           | 2           |
| <i>Botrytis cinerea</i>            | 1          | 3          | 0          | 2           | 2           | 3           | 2           | 4           | 21          | 0           | 0           | 4           | 0           | 6           |
| <i>Colletotrichum higginsianum</i> | 3          | 7          | 0          | 7           | 5           | 10          | 1           | 1           | 13          | 1           | 7           | 4           | 1           | 21          |
| <i>Magnaporthe oryzae</i>          | 3          | 7          | 0          | 6           | 5           | 3           | 0           | 3           | 3           | 4           | 6           | 0           | 0           | 20          |
| <i>Zymoseptoria tritici</i>        | 0          | 1          | 1          | 2           | 1           | 1           | 0           | 1           | 2           | 1           | 7           | 2           | 1           | 9           |
| <i>Peltaster fructicola</i>        | 0          | 0          | 0          | 0           | 0           | 0           | 0           | 1           | 1           | 0           | 5           | 1           | 0           | 1           |

| <b>Fungi</b>                       | <b>GH45</b> | <b>GH51</b> | <b>GH53</b> | <b>GH54</b> | <b>GH62</b> | <b>GH67</b> | <b>GH74</b> | <b>GH78</b> | <b>GH88</b> | <b>GH93</b> | <b>GH95</b> | <b>GH105</b> | <b>GH115</b> |
|------------------------------------|-------------|-------------|-------------|-------------|-------------|-------------|-------------|-------------|-------------|-------------|-------------|--------------|--------------|
| <i>Neurospora crassa</i>           | 1           | 1           | 1           | 1           | 0           | 1           | 6           | 2           | 0           | 3           | 0           | 2            | 2            |
| <i>Laccaria bicolor</i>            | 0           | 0           | 0           | 0           | 0           | 0           | 5           | 0           | 1           | 0           | 1           | 9            | 0            |
| <i>Rhizophagus irregularis</i>     | 0           | 0           | 0           | 0           | 0           | 0           | 1           | 0           | 0           | 0           | 0           | 0            | 0            |
| <i>Rhizopus oryzae</i>             | 5           | 0           | 0           | 0           | 0           | 0           | 7           | 0           | 0           | 0           | 0           | 0            | 0            |
| <i>Saccharomyces cerevisiae</i>    | 0           | 0           | 0           | 0           | 0           | 0           | 12          | 0           | 0           | 0           | 0           | 0            | 0            |
| <i>Puccinia graminis</i>           | 0           | 0           | 0           | 0           | 0           | 0           | 2           | 0           | 0           | 0           | 0           | 2            | 0            |
| <i>Ustilago maydis</i>             | 3           | 2           | 0           | 0           | 1           | 0           | 2           | 0           | 0           | 0           | 0           | 2            | 1            |
| <i>Botrytis cinerea</i>            | 2           | 2           | 2           | 1           | 1           | 0           | 2           | 7           | 1           | 1           | 3           | 2            | 2            |
| <i>Colletotrichum higginsianum</i> | 1           | 2           | 2           | 0           | 1           | 1           | 9           | 5           | 1           | 1           | 1           | 6            | 4            |
| <i>Magnaporthe oryzae</i>          | 1           | 3           | 1           | 1           | 4           | 1           | 6           | 3           | 1           | 1           | 2           | 3            | 4            |
| <i>Zymoseptoria tritici</i>        | 1           | 2           | 2           | 1           | 1           | 0           | 1           | 3           | 0           | 1           | 0           | 3            | 1            |
| <i>Peltaster fructicola</i>        | 0           | 2           | 0           | 1           | 0           | 0           | 1           | 1           | 0           | 0           | 0           | 0            | 0            |

- 1
- 2
- 3
- 4
- 5
- 6
- 7
- 8
- 9
- 10
- 11
- 12
- 13
- 14
- 15
- 16
- 17
- 18
- 19
- 20
- 21
- 22
- 23
- 24

1 **Supplementary Table S5. Manually annotated PCWDE-coding genes in *P. fruticicola*.**

| Gene ID    | Substrate                                                             | Enzyme activity               | Abbreviation | EC number | CAZyme family | Secretion signal |
|------------|-----------------------------------------------------------------------|-------------------------------|--------------|-----------|---------------|------------------|
| Pelfr_4541 | Pectin (backbone chain)                                               | Exopolygalacturonase          | PGX          | 3.2.1.67  | GH28          | Y                |
| Pelfr_4343 | Pectin (backbone/side chain)                                          | $\alpha$ -L-rhamnosidase      | RHA          | 3.2.1.40  | GH78          | N                |
| Pelfr_0259 | Pectin (side chain)/Hemicellulose (Xyloglucan, side chain)            | $\beta$ -1,4-Galactosidase    | LAC          | 3.2.1.23  | GH2           | N                |
| Pelfr_4976 | Pectin (side chain)/Hemicellulose (Xyloglucan, side chain)            | $\beta$ -1,4-Galactosidase    | LAC          | 3.2.1.23  | GH35          | Y                |
| Pelfr_3609 | Pectin (side chain)                                                   | Endoarabinase                 | ABN          | 3.2.1.99  | GH43          | N                |
| Pelfr_2065 | Pectin (side chain)/Hemicellulose (Xylan, side chain)                 | $\alpha$ -Arabinofuranosidase | ABF          | 3.2.1.55  | GH51          | N                |
| Pelfr_1270 | Pectin (side chain)/Hemicellulose (Xylan, side chain)                 | $\alpha$ -Arabinofuranosidase | ABF          | 3.2.1.55  | GH51          | N                |
| Pelfr_5292 | Pectin (side chain)/Hemicellulose (Xylan, side chain)                 | $\alpha$ -Arabinofuranosidase | ABF          | 3.2.1.55  | GH54          | N                |
| Pelfr_6616 | Pectin (side chain)/Hemicellulose (Xylan, backbone chain)             | $\beta$ -1,4-Xylosidase       | BXL          | 3.2.1.37  | GH3           | Y                |
| Pelfr_2228 | Cellulose (backbone chain)/Hemicellulose (Xyloglucan, backbone chain) | $\beta$ -1,3-Glucosidase      | BGL          | 3.2.1.21  | GH3           | N                |
| Pelfr_2067 | Cellulose (backbone chain)/Hemicellulose (Xyloglucan, backbone chain) | $\beta$ -1,4-Glucosidase      | BGL          | 3.2.1.21  | GH3           | N                |
| Pelfr_1452 | Cellulose (backbone chain)/Hemicellulose (Xyloglucan, backbone chain) | $\beta$ -1,4-Glucosidase      | BGL          | 3.2.1.21  | GH3           | N                |
| Pelfr_4358 | Cellulose (backbone chain)/Hemicellulose (Xyloglucan, backbone chain) | $\beta$ -1,4-Glucosidase      | BGL          | 3.2.1.21  | GH3           | N                |
| Pelfr_3458 | Cellulose (backbone chain)/Hemicellulose (Xyloglucan, backbone chain) | $\beta$ -1,4-Glucosidase      | BGL          | 3.2.1.21  | GH3           | Y                |
| Pelfr_6030 | Cellulose (backbone chain)/Hemicellulose (Xyloglucan, backbone chain) | $\beta$ -1,4-Glucosidase      | BGL          | 3.2.1.21  | GH3           | Y                |
| Pelfr_6282 | Cellulose (backbone chain)/Hemicellulose (Xyloglucan, backbone chain) | $\beta$ -1,4-Glucosidase      | BGL          | 3.2.1.21  | GH1           | N                |
| Pelfr_6050 | Hemicellulose (Galactomannan, side chain)                             | $\alpha$ -1,4-Galactosidase   | BGL          | 3.2.1.22  | GH27          | N                |
| Pelfr_0281 | Hemicellulose (Galactomannan, backbone chain)                         | $\beta$ -1,4-Mannosidase      | MND          | 3.2.1.25  | GH2           | Y                |
| Pelfr_2106 | Cutin                                                                 | Cutinase                      | -            | 3.1.1.74  | CE5           | N                |
| Pelfr_1390 | Cutin                                                                 | Cutinase                      | -            | 3.1.1.74  | CE5           | N                |
| Pelfr_5491 | Cutin                                                                 | Cutinase                      | -            | 3.1.1.74  | CE5           | N                |
| Pelfr_3966 | Cutin                                                                 | Cutinase                      | -            | 3.1.1.74  | CE5           | N                |
| Pelfr_3219 | Cutin                                                                 | Cutinase                      | -            | 3.1.1.74  | CE5           | Y                |
| Pelfr_1915 | Cutin                                                                 | Cutinase                      | -            | 3.1.1.74  | CE5           | Y                |

2

3

1 **Supplementary Table S6. Manually annotated PCWDE-coding genes in *Z. tritici*.**

| Gene ID       | Substrate                                                  | Enzyme activity                          | Abbreviation | EC number | CAZyme family | Secretion signal |
|---------------|------------------------------------------------------------|------------------------------------------|--------------|-----------|---------------|------------------|
| Mycgr3_66866  | Pectin (side chain)                                        | Pectin methyl esterase                   | PME          | 3.1.1.11  | CE8           | Y                |
| Mycgr3_85457  | Pectin (backbone chain)                                    | Pectate lyase                            | PLY          | 4.2.2.2   | PL1           | Y                |
| Mycgr3_42327  | Pectin (backbone chain)                                    | Pectate lyase                            | PLY          | 4.2.2.2   | PL1           | Y                |
| Mycgr3_27839  | Pectin (backbone chain)                                    | Pectate lyase                            | PLY          | 4.2.2.2   | PL3           | N                |
| Mycgr3_86032  | Pectin (backbone chain)                                    | Exopolygalacturonase                     | PGX          | 3.2.1.67  | GH28          | N                |
| Mycgr3_77196  | Pectin (backbone chain)                                    | Rhamnogalacturonase                      | RHG          | 3.2.1.171 | GH28          | Y                |
| Mycgr3_51381  | Pectin (side chain)                                        | $\beta$ -1,4-Endogalactanase             | GAL          | 3.2.1.89  | GH53          | N                |
| Mycgr3_25958  | Pectin (side chain)                                        | $\beta$ -1,4-Endogalactanase             | GAL          | 3.2.1.89  | GH53          | N                |
| Mycgr3_33711  | Pectin (backbone/side chain)                               | $\alpha$ -L-rhamnosidase                 | RHA          | 3.2.1.40  | GH78          | N                |
| Mycgr3_69329  | Pectin (backbone/side chain)                               | $\alpha$ -L-rhamnosidase                 | RHA          | 3.2.1.40  | GH78          | N                |
| Mycgr3_95102  | Pectin (side chain)                                        | Exoarabinanase                           | ABX          | 3.2.1.-   | GH93          | Y                |
| Mycgr3_57259  | Pectin (backbone chain)                                    | Unsaturated glucuronyl hydrolase         | UGH          | 3.2.1.179 | GH105         | N                |
| Mycgr3_50077  | Pectin (backbone chain)                                    | Unsaturated rhamnogalacturonyl hydrolase | URH          | 3.2.1.172 | GH105         | N                |
| Mycgr3_68586  | Pectin (side chain)/Hemicellulose (Xyloglucan, side chain) | $\beta$ -1,4-Galactosidase               | LAC          | 3.2.1.23  | GH2           | N                |
| Mycgr3_43384  | Pectin (side chain)/Hemicellulose (Xyloglucan, side chain) | $\beta$ -1,4-Galactosidase               | LAC          | 3.2.1.23  | GH2           | N                |
| Mycgr3_87705  | Pectin (side chain)/Hemicellulose (Xyloglucan, side chain) | $\beta$ -1,4-Galactosidase               | LAC          | 3.2.1.23  | GH2           | Y                |
| Mycgr3_51250  | Pectin (side chain)/Hemicellulose (Xyloglucan, side chain) | $\beta$ -1,4-Galactosidase               | LAC          | 3.2.1.23  | GH2           | N                |
| Mycgr3_86272  | Pectin (side chain)/Hemicellulose (Xyloglucan, side chain) | $\beta$ -1,4-Galactosidase               | LAC          | 3.2.1.23  | GH2           | N                |
| Mycgr3_42647  | Pectin (side chain)/Hemicellulose (Xyloglucan, side chain) | $\beta$ -1,4-Galactosidase               | LAC          | 3.2.1.23  | GH2           | N                |
| Mycgr3_75961  | Pectin (side chain)/Hemicellulose (Xyloglucan, side chain) | $\beta$ -1,4-Galactosidase               | LAC          | 3.2.1.23  | GH35          | N                |
| Mycgr3_101693 | Pectin (side chain)/Hemicellulose                          | $\beta$ -1,4-Galactosidase               | LAC          | 3.2.1.23  | GH35          | N                |

|               |                                          |                               |     |          |      |   |  |
|---------------|------------------------------------------|-------------------------------|-----|----------|------|---|--|
|               | (Xyloglucan, side chain)                 |                               |     |          |      |   |  |
| Mycgr3_105728 | Pectin (side chain)/Hemicellulose        | $\beta$ -1,4-Xylosidase       | BXL | 3.2.1.37 | GH43 | Y |  |
|               | (Xylan, backbone chain)                  |                               |     |          |      |   |  |
| Mycgr3_75584  | Pectin (side chain)/Hemicellulose        | $\beta$ -1,4-Xylosidase       | BXL | 3.2.1.37 | GH43 | Y |  |
|               | (Xylan, backbone chain)                  |                               |     |          |      |   |  |
| Mycgr3_73095  | Pectin (side chain)/Hemicellulose        | $\beta$ -1,4-Xylosidase       | BXL | 3.2.1.37 | GH43 | N |  |
|               | (Xylan, backbone chain)                  |                               |     |          |      |   |  |
| Mycgr3_105323 | Pectin (side chain)                      | Endoarabinase                 | ABN | 3.2.1.99 | GH43 | Y |  |
| Mycgr3_30121  | Pectin (side chain)/Hemicellulose        | $\beta$ -1,4-Xylosidase       | BXL | 3.2.1.37 | GH43 | Y |  |
|               | (Xylan, backbone chain)                  |                               |     |          |      |   |  |
| Mycgr3_98714  | Pectin (side chain)/Hemicellulose        | $\beta$ -1,4-Xylosidase       | BXL | 3.2.1.37 | GH43 | N |  |
|               | (Xylan, backbone chain)                  |                               |     |          |      |   |  |
| Mycgr3_84076  | Pectin (side chain)/Hemicellulose        | $\beta$ -1,4-Xylosidase       | BXL | 3.2.1.37 | GH43 | N |  |
|               | (Xylan, backbone chain)                  |                               |     |          |      |   |  |
| Mycgr3_96505  | Pectin (side chain)/Hemicellulose        | $\beta$ -1,4-Xylosidase       | BXL | 3.2.1.37 | GH43 | Y |  |
|               | (Xylan, backbone chain)                  |                               |     |          |      |   |  |
| Mycgr3_40215  | Pectin (side chain)/Hemicellulose        | $\alpha$ -Arabinofuranosidase | ABF | 3.2.1.55 | GH51 | N |  |
|               | (Xylan, side chain)                      |                               |     |          |      |   |  |
| Mycgr3_111130 | Pectin (side chain)/Hemicellulose        | $\alpha$ -Arabinofuranosidase | ABF | 3.2.1.55 | GH51 | Y |  |
|               | (Xylan, side chain)                      |                               |     |          |      |   |  |
| Mycgr3_70396  | Pectin (side chain)/Hemicellulose        | $\alpha$ -Arabinofuranosidase | ABF | 3.2.1.55 | GH54 | Y |  |
|               | (Xylan, side chain)                      |                               |     |          |      |   |  |
| Mycgr3_68922  | Pectin (side chain)/Hemicellulose        | $\alpha$ -Arabinofuranosidase | ABF | 3.2.1.55 | GH62 | Y |  |
|               | (Xylan, side chain)                      |                               |     |          |      |   |  |
| Mycgr3_71284  | Pectin (side chain)/Hemicellulose        | $\beta$ -1,4-Xylosidase       | BXL | 3.2.1.37 | GH3  | Y |  |
|               | (Xylan, backbone chain)                  |                               |     |          |      |   |  |
| Mycgr3_38178  | Pectin (side chain)/Hemicellulose        | $\beta$ -1,4-Xylosidase       | BXL | 3.2.1.37 | GH3  | N |  |
|               | (Xylan, backbone chain)                  |                               |     |          |      |   |  |
| Mycgr3_85505  | Cellulose (backbone chain)/Hemicellulose | $\beta$ -1,4-Glucosidase      | BGL | 3.2.1.21 | GH3  | Y |  |
|               | (Xyloglucan, backbone                    |                               |     |          |      |   |  |

|               |                                                                       |                          |     |          |     |   |
|---------------|-----------------------------------------------------------------------|--------------------------|-----|----------|-----|---|
| Mycgr3_41307  | Cellulose (backbone chain)/Hemicellulose (Xyloglucan, backbone chain) | $\beta$ -1,4-Glucosidase | BGL | 3.2.1.21 | GH3 | N |
| Mycgr3_99970  | Cellulose (backbone chain)/Hemicellulose (Xyloglucan, backbone chain) | $\beta$ -1,4-Glucosidase | BGL | 3.2.1.21 | GH3 | Y |
| Mycgr3_45540  | Cellulose (backbone chain)/Hemicellulose (Xyloglucan, backbone chain) | $\beta$ -1,4-Glucosidase | BGL | 3.2.1.21 | GH3 | N |
| Mycgr3_107206 | Cellulose (backbone chain)/Hemicellulose (Xyloglucan, backbone chain) | $\beta$ -1,4-Glucosidase | BGL | 3.2.1.21 | GH3 | N |
| Mycgr3_20995  | Cellulose (backbone chain)/Hemicellulose (Xyloglucan, backbone chain) | $\beta$ -1,4-Glucosidase | BGL | 3.2.1.21 | GH3 | N |
| Mycgr3_54587  | Cellulose (backbone chain)/Hemicellulose (Xyloglucan, backbone chain) | $\beta$ -1,4-Glucosidase | BGL | 3.2.1.21 | GH3 | N |
| Mycgr3_38222  | Cellulose (backbone chain)/Hemicellulose (Xyloglucan, backbone chain) | $\beta$ -1,4-Glucosidase | BGL | 3.2.1.21 | GH3 | N |
| Mycgr3_42620  | Cellulose (backbone chain)/Hemicellulose (Xyloglucan, backbone chain) | $\beta$ -1,4-Glucosidase | BGL | 3.2.1.21 | GH3 | N |
| Mycgr3_42323  | Cellulose (backbone chain)/Hemicellulose (Xyloglucan, backbone chain) | $\beta$ -1,4-Glucosidase | BGL | 3.2.1.21 | GH3 | Y |
| Mycgr3_64142  | Cellulose (backbone chain)/Hemicellulose (Xyloglucan, backbone chain) | $\beta$ -1,4-Glucosidase | BGL | 3.2.1.21 | GH3 | Y |
| Mycgr3_77647  | Cellulose (backbone chain)/Hemicellulose (Xyloglucan, backbone        | $\beta$ -1,4-Glucosidase | BGL | 3.2.1.21 | GH3 | N |



|               |                                                                       |                             |      |           |      |   |
|---------------|-----------------------------------------------------------------------|-----------------------------|------|-----------|------|---|
| Mycgr3_70973  | Cellulose (backbone chain)/Hemicellulose (Xyloglucan, backbone chain) | $\beta$ -1,4-Glucosidase    | BGL  | 3.2.1.21  | GH1  | N |
| Mycgr3_49899  | Cellulose (backbone chain)/Hemicellulose (Xyloglucan, backbone chain) | $\beta$ -1,4-Glucosidase    | BGL  | 3.2.1.21  | GH1  | Y |
| Mycgr3_100252 | Cellulose (backbone chain)/Hemicellulose (Xyloglucan, backbone chain) | Cellobiohydrolase I         | CBHI | 3.2.1.176 | GH7  | N |
| Mycgr3_76589  | Cellulose (backbone chain)/Hemicellulose (Xyloglucan, backbone chain) | $\beta$ -1,4-Endoglucanase  | EG   | 3.2.1.4   | GH45 | Y |
| Mycgr3_71664  | Cellulose (backbone chain)/Hemicellulose (Xyloglucan, backbone chain) | $\beta$ -1,4-Endoglucanase  | EG   | 3.2.1.4   | GH5  | N |
| Mycgr3_105871 | Cellulose (backbone chain)/Hemicellulose (Xyloglucan, backbone chain) | $\beta$ -1,4-Endoglucanase  | EG   | 3.2.1.4   | GH12 | Y |
| Mycgr3_94846  | Hemicellulose (Xylan, backbone chain)                                 | $\beta$ -1,4-Endoxylanase   | XLN  | 3.2.1.8   | GH10 | Y |
| Mycgr3_61141  | Hemicellulose (Xylan, backbone chain)                                 | $\beta$ -1,4-Endoxylanase   | XLN  | 3.2.1.8   | GH10 | Y |
| Mycgr3_60105  | Hemicellulose (Xylan, backbone chain)                                 | $\beta$ -1,4-Endoxylanase   | XLN  | 3.2.1.8   | GH11 | Y |
| Mycgr3_107208 | Hemicellulose (Galactomannan, side chain)                             | $\alpha$ -1,4-Galactosidase | AGL  | 3.2.1.22  | GH27 | N |
| Mycgr3_110289 | Hemicellulose (Galactomannan, side chain)                             | $\alpha$ -1,4-Galactosidase | AGL  | 3.2.1.22  | GH36 | Y |
| Mycgr3_68054  | Hemicellulose (Galactomannan, backbone chain)                         | $\beta$ -1,4-Mannosidase    | MND  | 3.2.1.25  | GH2  | N |
| Mycgr3_107565 | Hemicellulose (Galactomannan, backbone chain)                         | $\beta$ -1,4-Mannosidase    | MND  | 3.2.1.25  | GH2  | Y |
| Mycgr3_92097  | Hemicellulose                                                         | $\beta$ -1,4-Endomannanase  | MAN  | 3.2.1.78  | GH5  | Y |

|              |                                    |                      |     |          |      |   |
|--------------|------------------------------------|----------------------|-----|----------|------|---|
|              | (Galactomannan,<br>backbone chain) |                      |     |          |      |   |
| Mycgr3_38237 | Hemicellulose                      | $\alpha$ -Fucosidase | AFC | 3.2.1.51 | GH29 | N |
|              | (Xyloglucan, side chain)           |                      |     |          |      |   |
| Mycgr3_68483 | Cutin                              | Cutinase             | -   | 3.1.1.74 | CE5  | Y |
| Mycgr3_99331 | Cutin                              | Cutinase             | -   | 3.1.1.74 | CE5  | Y |
| Mycgr3_18212 | Cutin                              | Cutinase             | -   | 3.1.1.74 | CE5  | N |
| Mycgr3_43394 | Cutin                              | Cutinase             | -   | 3.1.1.74 | CE5  | Y |
| Mycgr3_35055 | Cutin                              | Cutinase             | -   | 3.1.1.74 | CE5  | N |
| Mycgr3_77282 | Cutin                              | Cutinase             | -   | 3.1.1.74 | CE5  | Y |

1

2

3

4

### 5 Supplementary Table S7. Secondary metabolism (SM) key genes in *P. fructicola*.

| Gene ID    | SM cluster | SM class | Nr annotation                                            | E-value |
|------------|------------|----------|----------------------------------------------------------|---------|
| Pelfr_2368 | Cluster1   | PKS      | Conidial pigment biosynthesis polyketide synthase        | 0.0     |
| Pelfr_4242 | Cluster2   | PKS      | Conidial yellow pigment biosynthesis polyketide synthase | 0.0     |
| Pelfr_6860 | Cluster3   | PKS      | Lovastatin nonaketide synthase                           | 0.0     |
| Pelfr_1160 | Cluster4   | PKS-NRPS | Hybrid PKS-NRPS enzyme                                   | 0.0     |
| Pelfr_0875 | Cluster5   | PKS-NRPS | Lovastatin nonaketide synthase                           | 0.0     |
| Pelfr_0462 | Cluster6   | NRPS     | HC-toxin synthetase-like protein                         | 1e-151  |
| Pelfr_0485 | Cluster6   | NRPS     | HC-toxin synthetase-like protein                         | 0.0     |
| Pelfr_0978 | Cluster7   | NRPS     | Linear gramicidin synthase subunit D                     | 0.0     |
| Pelfr_6327 | Cluster8   | NRPS     | Nonribosomal siderophore peptide synthase                | 0.0     |
| Pelfr_6213 | Cluster9   | NRPS     | Linear gramicidin synthetase subunit C                   | 0.0     |
| Pelfr_6610 | Cluster10  | NRPS     | Peroxisomal-coenzyme A synthetase                        | 0.0     |
| Pelfr_3849 | Cluster11  | NRPS     | Acetyl-CoA synthetase-like protein                       | 0.0     |
| Pelfr_1264 | Cluster12  | TS       | Squalene synthase                                        | 0.0     |
| Pelfr_6032 | Cluster13  | TS       | Geranylgeranyl diphosphate synthase                      | 0.0     |
| Pelfr_4219 | Cluster14  | TS       | Lycopene beta-cyclase                                    | 0.0     |

6

7

8

9

### 10 Supplementary Table S8. DHN-melanin biosynthesis-related genes in *P. fructicola*.

| Gene ID    | Gene name | Description           | GenBank number of reference gene <sup>1</sup> | Identity | Similarity |
|------------|-----------|-----------------------|-----------------------------------------------|----------|------------|
| Pelfr_2368 | PKS18     | Polyketide synthase   | AY495659                                      | 65%      | 76%        |
| Pelfr_6774 | BRN2      | T4HN reductase        | EF060260                                      | 82%      | 91%        |
| Pelfr_0341 | SCD1      | Scytalone dehydratase | EF060261                                      | 69%      | 83%        |
| Pelfr_2393 | BRN1      | T3HN reductase        | AB001564                                      | 78%      | 87%        |

11

12 <sup>1</sup>GenBank numbers of the referenced gene models are from *Cochliobolus heterostrophus*.

13

1 **Supplementary Table S9. Genes and their expression, which involve in four major signal**  
 2 **transduction pathways, autophagy and Ros in *P. fruticicola* and related species.**

| Gene name                                                                             | <i>M. oryzae</i> | <i>Z. tritici</i> | <i>P. fruticicola</i> | <i>In vivo</i> <sup>1</sup> | <i>In vitro</i> <sup>2</sup> |
|---------------------------------------------------------------------------------------|------------------|-------------------|-----------------------|-----------------------------|------------------------------|
| <b>cAMP-PKA pathway: pathogenicity, surface recognition, and turgor generation</b>    |                  |                   |                       |                             |                              |
| Cap1                                                                                  | MGG_01722        | Mycgr3_76018      | Pelfr_1322            | 77.62                       | 51.78                        |
| Cpk2                                                                                  | MGG_02832        | Mycgr3_38697      | Pelfr_6488            | 0                           | 24.24                        |
| CpkA                                                                                  | MGG_06368        | Mycgr3_99725      | Pelfr_2492            | 5.07                        | 52.35                        |
| Ctdf                                                                                  | MGG_11346        | Mycgr3_89219      | Pelfr_8173            | 0                           | 0                            |
| Mac1                                                                                  | MGG_09898        | Mycgr3_86659      | Pelfr_5544            | 8.45                        | 52.81                        |
| MagA                                                                                  | MGG_01818        | Mycgr3_76503      | Pelfr_1576            | 12.05                       | 191.43                       |
| MagB                                                                                  | MGG_00365        | Mycgr3_52873      | Pelfr_5694            | 0.53                        | 65.31                        |
| Mgb1                                                                                  | MGG_05201        | Mycgr3_68892      | Pelfr_6673            | 0                           | 13.2                         |
| Mgg1                                                                                  | MGG_10193        | Mycgr3_102649     | Pelfr_0632            | 20.11                       | 201.07                       |
| Mstu1                                                                                 | MGG_00692        | Mycgr3_93828      | Pelfr_4840            | 4.19                        | 60.81                        |
| PdeH                                                                                  | MGG_05664        | Mycgr3_33550      | Pelfr_0043            | 18.16                       | 37.6                         |
| Pth11                                                                                 | MGG_05871        | Mycgr3_16078      | Pelfr_1389            | 12.48                       | 48.99                        |
| Pth12                                                                                 | MGG_12865        | -                 | -                     | -                           | -                            |
| Rgs1                                                                                  | MGG_14517        | Mycgr3_50182      | Pelfr_1219            | 0                           | 11.19                        |
| Som1                                                                                  | MGG_04708        | Mycgr3_109061     | Pelfr_0213            | 11.44                       | 31.45                        |
| <b>Pmk1 pathway: appressorium formation, pathogenicity, and invasive growth</b>       |                  |                   |                       |                             |                              |
| Cdc42                                                                                 | MGG_00466        | Mycgr3_99553      | Pelfr_2379            | 0                           | 155.43                       |
| Gap1                                                                                  | MGG_11062        | Mycgr3_86730      | Pelfr_1799            | 227.76                      | 206.74                       |
| Gas1                                                                                  | MGG_12337        | -                 | -                     | -                           | -                            |
| Gas2                                                                                  | MGG_04202        | -                 | -                     | -                           | -                            |
| Mcm1                                                                                  | MGG_02773        | Mycgr3_31170      | Pelfr_2334            | 24.51                       | 122.36                       |
| Msb2                                                                                  | MGG_06033        | -                 | Pelfr_2676            | 53.06                       | 247.9                        |
| Mst7                                                                                  | MGG_00800        | Mycgr3_52389      | Pelfr_2369            | 0.41                        | 104.79                       |
| Mst11                                                                                 | MGG_14847        | Mycgr3_71128      | Pelfr_0435            | 54.77                       | 49.18                        |
| Mst12                                                                                 | MGG_12958        | Mycgr3_46840      | Pelfr_4757            | 12.95                       | 212.64                       |
| Mst50                                                                                 | MGG_05199        | Mycgr3_91070      | Pelfr_6694            | 15.19                       | 55.78                        |
| Pic5                                                                                  | MGG_08600        | Mycgr3_100168     | Pelfr_0651            | 37.83                       | 19.23                        |
| Pmk1                                                                                  | MGG_09565        | Mycgr3_73071      | Pelfr_4994            | 0                           | 96.23                        |
| Ras1                                                                                  | MGG_06154        | Mycgr3_75299      | Pelfr_4161            | 64.57                       | 246.68                       |
| Ras2                                                                                  | MGG_09499        | Mycgr3_59862      | Pelfr_5632            | 0                           | 58.67                        |
| Rgf1                                                                                  | MGG_03064        | Mycgr3_57099      | Pelfr_6633            | 99.02                       | 59.32                        |
| Sfl1                                                                                  | MGG_06971        | Mycgr3_38379      | Pelfr_6316            | 18.59                       | 42.51                        |
| Sho1                                                                                  | MGG_09125        | Mycgr3_108657     | Pelfr_6493            | 45.94                       | 191.34                       |
| <b>Mps1 pathway: pathogenicity, penetration, cell wall integrity, and conidiation</b> |                  |                   |                       |                             |                              |
| Cch1                                                                                  | MGG_05643        | Mycgr3_32076      | Pelfr_3280            | 103.55                      | 51.04                        |
| Cna1                                                                                  | MGG_07456        | Mycgr3_100967     | Pelfr_3472            | 28.61                       | 90.75                        |
| Cnb1                                                                                  | MGG_06933        | Mycgr3_68731      | Pelfr_5246            | 13.52                       | 260.24                       |
| Crz1                                                                                  | MGG_05133        | Mycgr3_117712     | Pelfr_1135            | 20.69                       | 43.23                        |
| Mck1                                                                                  | MGG_00883        | -                 | Pelfr_2301            | 3.48                        | 18.81                        |
| Mig1                                                                                  | MGG_01204        | Mycgr3_117729     | Pelfr_5664            | 2.89                        | 36.74                        |

|      |           |               |            |        |        |
|------|-----------|---------------|------------|--------|--------|
| Mkk1 | MGG_06482 | Mycgr3_71299  | Pelfr_6025 | 9.15   | 213.35 |
| Mkk2 | MGG_00800 | Mycgr3_52389  | Pelfr_2369 | 0.41   | 104.79 |
| Mps1 | MGG_04943 | Mycgr3_102121 | Pelfr_1869 | 53.27  | 287.2  |
| Pkc1 | MGG_08689 | Mycgr3_87605  | Pelfr_4305 | 12.31  | 47.68  |
| Plc1 | MGG_02444 | Mycgr3_66273  | Pelfr_5462 | 0      | 14.59  |
| Pmc1 | MGG_02487 | Mycgr3_35226  | Pelfr_3000 | 19.93  | 55.7   |
| Rho1 | MGG_07176 | Mycgr3_106397 | Pelfr_0710 | 164.12 | 892.02 |
| Swi6 | MGG_09869 | Mycgr3_48696  | Pelfr_1581 | 2.82   | 16.89  |

**Oms1 pathway: osmoregulation, stress response, and fungicide sensitivity**

|      |           |               |            |       |        |
|------|-----------|---------------|------------|-------|--------|
| Ap1  | MGG_12814 | Mycgr3_35076  | Pelfr_3144 | 83.7  | 89.36  |
| Atf1 | MGG_08212 | Mycgr3_98304  | Pelfr_6217 | 45.26 | 127.81 |
| Hik1 | MGG_11174 | Mycgr3_35302  | Pelfr_0583 | 86    | 67.86  |
| Oms1 | MGG_01822 | Mycgr3_76502  | Pelfr_1558 | 1.87  | 534    |
| Pbs2 | MGG_10268 | Mycgr3_76249  | Pelfr_5316 | 65.72 | 121.39 |
| Skn7 | MGG_03516 | Mycgr3_109990 | Pelfr_3787 | 14.4  | 41.27  |
| Sln1 | MGG_07312 | Mycgr3_63909  | Pelfr_0738 | 18.23 | 47.59  |
| SSk1 | MGG_02897 | Mycgr3_70181  | Pelfr_5884 | 5.1   | 108.13 |
| Ssk2 | MGG_00183 | Mycgr3_67344  | Pelfr_3555 | 5.52  | 22.77  |
| Ypd1 | MGG_07173 | Mycgr3_32785  | Pelfr_0942 | 23.6  | 184.13 |

**Autophagy-related genes: conidiation, appressorium formation and pathogenicity**

|       |           |               |            |        |         |
|-------|-----------|---------------|------------|--------|---------|
| Atg1  | MGG_06393 | Mycgr3_73716  | Pelfr_1850 | 0.83   | 16.61   |
| Atg2  | MGG_05998 | Mycgr3_83423  | Pelfr_1077 | 1.14   | 11.44   |
| Atg3  | MGG_02959 | Mycgr3_99699  | Pelfr_1591 | 13.75  | 173.12  |
| Atg4  | MGG_03580 | Mycgr3_49421  | Pelfr_1738 | 0      | 58.2    |
| Atg5  | MGG_09262 | Mycgr3_86699  | Pelfr_2519 | 0      | 1.28    |
| Atg6  | MGG_03694 | Mycgr3_72630  | Pelfr_6195 | 3.26   | 51.55   |
| Atg7  | MGG_07297 | Mycgr3_100434 | Pelfr_4877 | 43.06  | 55.44   |
| Atg8  | MGG_01062 | -             | Pelfr_3311 | 190.88 | 1511.44 |
| Atg9  | MGG_09559 | Mycgr3_100550 | Pelfr_3729 | 14.7   | 75.6    |
| Atg10 | MGG_14737 | -             | Pelfr_1301 | 0      | 7.06    |
| Atg12 | MGG_00598 | Mycgr3_40907  | Pelfr_3199 | 0      | 7.09    |
| Atg13 | MGG_00454 | Mycgr3_58223  | Pelfr_3154 | 2.6    | 44.51   |
| Atg15 | MGG_12828 | Mycgr3_108706 | Pelfr_6428 | 11     | 68.77   |
| Atg16 | MGG_05255 | Mycgr3_90647  | Pelfr_6215 | 0      | 156.39  |
| Atg17 | MGG_07667 | Mycgr3_70424  | Pelfr_6704 | 21.13  | 18.96   |
| Atg18 | MGG_03139 | Mycgr3_75475  | Pelfr_5073 | 9.29   | 61.54   |

**Ros related genes: conidium germination and appressorium formation**

|      |           |               |            |        |        |
|------|-----------|---------------|------------|--------|--------|
| Des1 | MGG_04163 | -             | -          | -      | -      |
| Hyr1 | MGG_07460 | Mycgr3_102589 | Pelfr_5909 | 161.59 | 535.79 |
| Nox1 | MGG_00750 | Mycgr3_65626  | Pelfr_0062 | 0      | 32.21  |
| Nox2 | MGG_06559 | -             | -          | -      | -      |
| NoxR | MGG_05280 | Mycgr3_67898  | Pelfr_6118 | 32.13  | 120.48 |
| Rac1 | MGG_02731 | Mycgr3_106564 | Pelfr_4271 | 1.51   | 164.27 |

1

2 <sup>1</sup>Gene expression was quantified by RPKM in RNA-seq analysis; RPKM, reads per kilobase per million mapped  
3 reads.

4 <sup>2</sup>*In vivo* refers to transcripts expressed by *P. fructicola* infecting apple fruit about 1 month after inoculation; *In vitro*  
5 refers to transcripts expressed by *P. fructicola* growing on PDA at 22 °C for 15 days.

6 Note: Orthologous genes were aligned in the same lines.

7

8

9

10

11

12

13

14

15

16

17

18

19

20

21

22

23

24

25

26

27

28

29

30

31

32

33

34

35

36

37

38

39

40

41

42

43

1 **Supplementary Table S10. Fungi used for identification of multigene families and**  
 2 **phylogenetic analysis in this study.**

| Species                            | Taxonomy      | Lifestyle    | Gene number |
|------------------------------------|---------------|--------------|-------------|
| <i>Laccaria bicolor</i>            | Basidiomycota | Symbiosis    | 23,132      |
| <i>Rhizophagus irregularis</i>     | Glomeromycota | Symbiosis    | 30,282      |
| <i>Rhizopus oryzae</i>             | Zygomycota    | Saprotroph   | 17,467      |
| <i>Saccharomyces cerevisiae</i>    | Ascomycota    | Saprotroph   | 6,575       |
| <i>Neurospora crassa</i>           | Ascomycota    | Saprotroph   | 10,785      |
| <i>Puccinia graminis</i>           | Basidiomycota | Biotroph     | 20,534      |
| <i>Ustilago maydis</i>             | Basidiomycota | Biotroph     | 6,522       |
| <i>Botrytis cinerea</i>            | Ascomycota    | Necrotroph   | 16,447      |
| <i>Colletotrichum higginsianum</i> | Ascomycota    | Hemibiotroph | 16,172      |
| <i>Magnaporthe oryzae</i>          | Ascomycota    | Hemibiotroph | 11,054      |
| <i>Zymoseptoria tritici</i>        | Ascomycota    | Hemibiotroph | 10,933      |
| <i>Peltaster fructicola</i>        | Ascomycota    | Ectophyte    | 8,334       |

3  
 4  
 5  
 6  
 7  
 8  
 9  
 10  
 11  
 12  
 13  
 14  
 15  
 16  
 17  
 18  
 19  
 20  
 21  
 22  
 23  
 24  
 25  
 26  
 27  
 28  
 29  
 30  
 31

1 **Supplementary Table S11. Summary of CAZyme families involved in plant cell wall**  
 2 **degradation.**

| Substrate         |                               | Enzyme activity                          | Abbreviation | EC number                  | CAZyme family(ies)            |
|-------------------|-------------------------------|------------------------------------------|--------------|----------------------------|-------------------------------|
| Cutin             | Backbone chain                | Cutinase                                 | -            | 3.1.1.74                   | CE5                           |
| Cellulose         | Backbone chain                | $\beta$ -1,4-Endoglucanase               | EG           | 3.2.1.4                    | GH3, -5, -6, -7, -9, -12, -45 |
|                   | Backbone chain                | Cellobiohydrolase (reducing end)         | CBHI         | 3.2.1.176                  | GH7                           |
|                   | Backbone chain                | Cellobiohydrolase (nonreducing end)      | CBHII        | 3.2.1.91                   | GH6                           |
|                   | Backbone chain                | $\beta$ -1,4-Glucosidase                 | BGL          | 3.2.1.21                   | GH1, -3                       |
| Pectin            | Backbone chain                | Endopolygalacturonase                    | PGA          | 3.2.1.15                   | GH28                          |
|                   | Backbone chain                | Exopolygalacturonase                     | PGX          | 3.2.1.67                   | GH28                          |
|                   | Backbone chain                | Endo-xylogalacturonan hydrolase          | XGH          | 3.2.1.-                    | GH28                          |
|                   | Backbone chain                | Rhamnogalacturonase                      | RHG          | 3.2.1.171                  | GH28                          |
|                   | Backbone chain                | Rhamnogalacturonan                       | RHX          | 3.2.1.173                  | GH28                          |
|                   | Backbone chain                | $\alpha$ -1,2-galacturonohydrolase       |              |                            |                               |
|                   | Backbone chain                | Rhamnogalacturonan                       | RGXB         | 3.2.1.174                  | GH28                          |
|                   | Backbone chain                | $\alpha$ -L-rhamnopyranohydrolase        |              |                            |                               |
|                   | Backbone/side chain           | $\alpha$ -L-rhamnosidase                 | RHA          | 3.2.1.40                   | GH78                          |
|                   | Backbone chain                | Pectin lyase                             | PEL          | 4.2.2.10                   | PL1                           |
|                   | Backbone chain                | Pectate lyase                            | PLY          | 4.2.2.2                    | PL1, -2, -3, -9, -10          |
|                   | Backbone chain                | Rhamnogalacturonan lyase                 | RGL          | 4.2.2.23                   | PL4, -11                      |
|                   | Backbone chain                | Unsaturated rhamnogalacturonan hydrolase | URH          | 3.2.1.172                  | GH105                         |
|                   |                               |                                          |              | <i>(Bacillus subtilis)</i> |                               |
|                   | Backbone chain                | Unsaturated glucuronyl hydrolase         | UGH          | 3.2.1.179                  | GH88, -105                    |
|                   |                               |                                          |              | <i>(Bacillus sp.)</i>      |                               |
|                   | Side chain                    | Endoarabinanase                          | ABN          | 3.2.1.99                   | GH43                          |
| Side chain        | Exoarabinanase                | ABX                                      | 3.2.1.-      | GH93                       |                               |
| Side chain        | $\beta$ -1,4-Endogalactanase  | GAL                                      | 3.2.1.89     | GH53                       |                               |
| Side chain        | $\alpha$ -Arabinofuranosidase | ABF                                      | 3.2.1.55     | GH51, -54, -62             |                               |
| Side chain        | $\beta$ -1,4-Xylosidase       | BXL                                      | 3.2.1.37     | GH3, -43                   |                               |
| Side chain        | $\beta$ -1,4-Galactosidase    | LAC                                      | 3.2.1.23     | GH2, -35                   |                               |
| Side chain        | Pectin methyl esterase        | PME                                      | 3.1.1.11     | CE8                        |                               |
| Xylan/Heteroxytan | Backbone chain                | $\beta$ -1,4-Endoxylanase                | XLN          | 3.2.1.8                    | GH10, -11                     |
|                   | Backbone chain                | $\beta$ -1,4-Xylosidase                  | BXL          | 3.2.1.37                   | GH3, -43                      |
|                   | Side chain                    | $\alpha$ -Arabinofuranosidase            | ABF          | 3.2.1.55                   | GH51, -54, -62                |
|                   | Side chain                    | $\alpha$ -Glucuronidase                  | AGU          | 3.2.1.139                  | GH67, -115                    |
| Galactomannan     | Backbone chain                | $\beta$ -1,4-Endomannanase               | MAN          | 3.2.1.78                   | GH5, -26                      |
|                   | Backbone chain                | $\beta$ -1,4-Mannosidase                 | MND          | 3.2.1.25                   | GH2                           |
|                   | Side chain                    | $\alpha$ -1,4-Galactosidase              | AGL          | 3.2.1.22                   | GH27, -36                     |

|            |                |                                       |       |           |                               |
|------------|----------------|---------------------------------------|-------|-----------|-------------------------------|
| Xyloglucan | Backbone chain | Xyloglucan $\beta$ -1,4-endoglucanase | XEG   | 3.2.1.151 | GH12, -74                     |
|            | Backbone chain | $\beta$ -1,4-Endoglucanase            | EG    | 3.2.1.4   | GH3, -5, -6, -7, -9, -12, -45 |
|            | Backbone chain | Cellobiohydrolase (reducing end)      | CBHI  | 3.2.1.176 | GH7                           |
|            | Backbone chain | Cellobiohydrolase (nonreducing end)   | CBHII | 3.2.1.91  | GH6                           |
|            | Backbone chain | $\beta$ -1,4-Glucosidase              | BGL   | 3.2.1.21  | GH1, -3                       |
|            | Side chain     | $\alpha$ -Xylosidase                  | AXL   | 3.2.1.177 | GH31                          |
|            | Side chain     | $\alpha$ -Fucosidase                  | AFC   | 3.2.1.51  | GH29, -95                     |
|            | Side chain     | $\beta$ -1,4-Galactosidase            | LAC   | 3.2.1.23  | GH2, -35                      |

1  
2  
3  
4  
5  
6  
7  
8  
9  
10  
11  
12  
13  
14  
15  
16  
17  
18  
19  
20  
21  
22  
23  
24  
25  
26  
27  
28  
29  
30  
31  
32  
33  
34



1 **Supplementary Notes**

2

3 **Gene prediction and annotation.**

4 The draft genome of *P. fructicola* was closed by GapFiller<sup>1</sup> with the dataset of paired reads, then  
5 masked using RepeatMasker<sup>2</sup> with both the latest RepBase fungal library<sup>3</sup> and *ab initio* library  
6 generated by RepeatModeler<sup>2</sup>. The modified assembly containing only scaffolds larger than 200  
7 bp was used as input for gene model prediction and other downstream analyses. Gene calling was  
8 conducted using an annotation pipeline and genome-database management tool MAKER2<sup>4</sup>, which  
9 combines three different *ab initio* predictors: GeneMark-ES<sup>5</sup>, Augustus<sup>6</sup>, and SNAP<sup>7</sup>. In addition,  
10 proteomes of several fungi within the same order as *P. fructicola* were downloaded from JGI  
11 Fungal Genome Portal MycoCosm<sup>8</sup> and served as experimental evidence for quality control of the  
12 result of the above computational methods. A set of 248 CEGs identified by Parra *et al.*<sup>9</sup> were used  
13 to evaluate the completeness of the gene space in the genome of *P. fructicola*.

14 All predicted gene models were functionally annotated using an all-in-one bioinformatics software  
15 suite, Blast2GO, based on the Gene Ontology vocabulary<sup>10</sup>. This high-throughput functional  
16 annotation pipeline integrates various annotation strategies and tools, including BLASTp  
17 alignment against GenBank with non-redundant set<sup>11</sup>, GO (Gene Ontology) terms mapping<sup>12</sup>,  
18 InterProScan<sup>13</sup>, Enzyme Commission (EC) numbers assigning<sup>14</sup>, and Kyoto Encyclopedia of  
19 Genes and Genomes (KEGG)<sup>15</sup>. In addition, they were subjected to Conserved Domains Database  
20 (CDD)<sup>16</sup>, Pfam<sup>17</sup>, and Clusters of Orthologous Group (COG) analysis<sup>18</sup>. The rRNA-coding region  
21 (rDNA) was designated using RNAmmer<sup>19</sup>, but the copy number of rDNA (tandem repeat and low  
22 polymorphism)<sup>20</sup> in the assembly could be estimated only by calculating its average sequencing  
23 depth (divided by the global depth).

24

25 **Multigene families and phylogenetic analysis.**

26 Eleven representative fungi (Supplementary Table S10) that collectively span diverse lifestyles  
27 (symbiotic, saprophytic, biotrophic, hemibiotrophic and necrotrophic) and phyla (Ascomycota,  
28 Basidiomycota, Zygomycota and Glomeromycota) were selected to predict multigene families  
29 along with *P. fructicola*. Gene clusters containing both orthologs and paralogs were built among a  
30 total of 178,237 proteins (retrieved from JGI Fungal Genome Portal MycoCosm except *P.*  
31 *fructicola*) using OrthoMCL<sup>21</sup> based on the Markov cluster algorithm (MCL)<sup>22</sup>.

32 To construct a genome-based phylogenetic tree of the above 12 species, single-copy orthologous  
33 families (having exactly one gene for each organism) were collected from the MCL clustering  
34 result. Multiple alignments of the protein sequences belonging to the same families were parallelly  
35 performed in batch mode using MAFFT<sup>23</sup>. Conservative positions in the alignment result were  
36 extracted through GBLOCKS<sup>24</sup> and then used to estimate the best protein evolution model with  
37 ProtTest 3.4<sup>25</sup>. Maximum-likelihood phylogenetic analysis of the concatenated well-aligned  
38 regions was carried out using RAxML<sup>26</sup> with a bootstrap value of 1000 replications. The RAxML  
39 tree obtained was visualized in FigTree v1.4.2 (<http://tree.bio.ed.ac.uk/software/>). The divergence  
40 times between species were estimated with the method provided by MEGA 6<sup>27</sup>, using the  
41 previously published calibration points as a reference: Ascomycota-Basidiomycota split 500 Myr,  
42 and Pezizomycotina-Saccharomycotina split 350 Myr<sup>28</sup>.

43 We also constructed the phylogenetic profiles for all gene families to reflect the absence or  
44 presence of a particular gene family in a given species. These profiles were combined with the

1 above species tree using the DOLLOP program from the PHYLIP package<sup>29</sup> to reconstruct the  
2 parsimonious series of gene gain and loss events for these fungal genomes. To define the  
3 minimum gene set for each ancestral node, the DOLLOP program was used, which follows the  
4 Dollo parsimony principle assuming that every gene appears exactly once on the tree and can be  
5 lost independently in different evolutionary lineages.

#### 6 7 **CAZymes and plant cell wall degrading enzymes.**

8 Proteomes were screened for carbohydrate-active modules using a web server for automated  
9 carbohydrate-active enzyme (CAZyme) annotation, dbCAN<sup>30</sup>. CAZyme module annotation by  
10 this program uses E-value, alignment length and coverage, with an E-value of <1e-5 for  
11 alignments of >80 amino acids and an E-value of <1e-3 for alignments of <80 amino acids. To  
12 eliminate those selected by dbCAN but not really CAZymes, proteins with CAZyme motifs with a  
13 dbCAN E-value >e-10 were individually examined using two online tools, Pfam<sup>17</sup> and BLASTp of  
14 non-redundant protein sequences in NCBI (<http://www.ncbi.nlm.nih.gov>).

15 Cellulases, hemicellulases, pectinases and cutinases collectively constituted the plant cell  
16 wall-degrading enzymes (PCWDEs) that we considered in this study. According to previous  
17 research<sup>31-33</sup>, the above four types of PCWDEs are distributed in a range of different CAZyme  
18 families (despite including some non-PCWDEs) (Supplementary Table S11) belonging to three  
19 functional classes, i.e., glycoside hydrolases (GHs), polysaccharide lyases (PLs), and carbohydrate  
20 esterases (CEs). We could therefore pick out these PCWDE-involved families from the predicted  
21 CAZymes and considered them as putative PCWDEs. Additionally, to identify the function of  
22 each putative PCWDE more accurately and discard the false positives, the BLASTp program and  
23 two online databases, mycoCLAP<sup>34</sup> and Fungal PCWDE Database<sup>35</sup> were jointly applied.

#### 24 25 **Secretomes, secreted peptidases and small secreted proteins.**

26 In the current study, secretomes were identified using a custom pipeline including SignalP version  
27 4.1<sup>36</sup>, TMHMM Server version 2.0<sup>37</sup>, TargetP 1.1 Server<sup>38</sup>, GPIsom<sup>39</sup> and WoLF PSORT<sup>40</sup>.  
28 Initially, all proteins of one organism with a SignalP SP = 'YES' or a TargetP Loc = S were  
29 selected and combined<sup>41</sup>. These proteins were then scanned for transmembrane (TM) domains  
30 using TMHMM and those with 0 TM or 1 TM, if located in or very close to the predicted  
31 N-terminal signal peptide (this often corresponds to the secretion signal), were kept. Of the  
32 retained set, proteins containing a potential GPI-anchor signal as predicted by the GPIsom web  
33 service were discarded. Eventually, WoLF PSORT was used to estimate the located sites and only  
34 those proteins that were credibly positioned in the extracellular space (i.e., extracellular score >15)  
35 were included into in the final secretome. The secreted proteins were submitted to the Merops  
36 database (e-value = 1e-04) (Release 9.12; <http://merops.sanger.ac.uk/>) for predicting peptidases<sup>42</sup>,  
37 and false positives were eliminated by parsing hits obtained following a BLASTp search (e-value  
38 = 1e-04) on the NCBI nr protein database. Small secreted proteins (SSPs) were defined here as the  
39 secreted proteins that are smaller than 200 aa, and an SSP was labeled as "cysteine-rich" when the  
40 percentage of cysteine residues in the protein was at least twice as high as the average percentage  
41 of cysteine residues in all predicted proteins of that species<sup>43</sup>.

#### 42 43 **Secondary metabolism genes.**

44 Nonribosomal peptide synthase (NRPS), polyketide synthase (PKS), hybrid NRPS-PKS,

1 dimethylallyl tryptophan synthase (DMATS), and terpene cyclase (TC) genes were identified in all  
2 12 genomes by using the web-based software packages SMURF<sup>44</sup> and antiSMASH 2.0<sup>45</sup> in  
3 combination. Employing these two functionally similar methods simultaneously allowed us to  
4 detect small conflicts generated between their results, which were further checked and corrected.  
5 Another reason for using the packages in tandem is that although SMURF and antiSMASH alone  
6 are unable to predict TC and DMATS genes, they can complement each other for this purpose.

## 8 **Supplementary References**

- 9
- 10 1 Boetzer, M. & Pirovano, W. Toward almost closed genomes with GapFiller. *Genome Biol.*  
11 **13**, R56 (2012).
- 12 2 Tarailo- Graovac, M. & Chen, N. Using RepeatMasker to identify repetitive elements in  
13 genomic sequences. *Curr. Protoc. Bioinformatics* **25**, 4.10.11-14.10.14 (2009).
- 14 3 Jurka, J. *et al.* Repbase Update, a database of eukaryotic repetitive elements. *Cytogenet.*  
15 *Genome Res.* **110**, 462-467 (2005).
- 16 4 Holt, C. & Yandell, M. MAKER2: an annotation pipeline and genome-database  
17 management tool for second-generation genome projects. *BMC bioinformatics* **12**, 491  
18 (2011).
- 19 5 Ter-Hovhannisyan, V., Lomsadze, A., Chernoff, Y. O. & Borodovsky, M. Gene prediction  
20 in novel fungal genomes using an ab initio algorithm with unsupervised training. *Genome*  
21 *Res.* **18**, 1979-1990 (2008).
- 22 6 Stanke, M. *et al.* AUGUSTUS: *ab initio* prediction of alternative transcripts. *Nucleic*  
23 *Acids Res.* **34**, W435-W439 (2006).
- 24 7 Korf, I. Gene finding in novel genomes. *BMC bioinformatics* **5**, 59 (2004).
- 25 8 Nordberg, H. *et al.* The genome portal of the Department of Energy Joint Genome  
26 Institute: 2014 updates. *Nucleic Acids Res.* **42**, D26-D31 (2014).
- 27 9 Parra, G., Bradnam, K., Ning, Z. M., Keane, T. & Korf, I. Assessing the gene space in  
28 draft genomes. *Nucleic Acids Res.* **37**, 289-297 (2009).
- 29 10 Gotz, S. *et al.* High-throughput functional annotation and data mining with the Blast2GO  
30 suite. *Nucleic Acids Res.* **36**, 3420-3435 (2008).
- 31 11 Altschul, S. F., Gish, W., Miller, W., Myers, E. W. & Lipman, D. J. Basic local alignment  
32 search tool. *J. Mol. Biol.* **215**, 403-410 (1990).
- 33 12 Ashburner, M. *et al.* Gene Ontology: tool for the unification of biology. *Nat. Genet.* **25**,  
34 25-29 (2000).
- 35 13 Jones, P. *et al.* InterProScan 5: genome-scale protein function classification.  
36 *Bioinformatics* **30**, 1236-1240 (2014).
- 37 14 Bairoch, A. The ENZYME database in 2000. *Nucleic Acids Res.* **28**, 304-305 (2000).
- 38 15 Kanehisa, M., Goto, S., Kawashima, S., Okuno, Y. & Hattori, M. The KEGG resource for  
39 deciphering the genome. *Nucleic Acids Res.* **32**, D277-D280 (2004).
- 40 16 Marchler-Bauer, A. *et al.* CDD: NCBI's conserved domain database. *Nucleic Acids Res.*  
41 **43**, D222-226 (2015).
- 42 17 Finn, R. D. *et al.* Pfam: the protein families database. *Nucleic Acids Res.* **42**, D222-D230  
43 (2014).
- 44 18 Tatusov, R. L., Galperin, M. Y., Natale, D. A. & Koonin, E. V. The COG database: a tool

1 for genome-scale analysis of protein functions and evolution. *Nucleic Acids Res.* **28**,  
2 33-36 (2000).

3 19 Lagesen, K. *et al.* RNAmmer: consistent and rapid annotation of ribosomal RNA genes.  
4 *Nucleic Acids Res.* **35**, 3100-3108 (2007).

5 20 Richard, G. F., Kerrest, A. & Dujon, B. Comparative genomics and molecular dynamics  
6 of DNA repeats in eukaryotes. *Microbiol. Mol. Biol. R.* **72**, 686-727 (2008).

7 21 Li, L., Stoeckert, C. J. & Roos, D. S. OrthoMCL: Identification of ortholog groups for  
8 eukaryotic genomes. *Genome Res.* **13**, 2178-2189 (2003).

9 22 Enright, A. J., Van Dongen, S. & Ouzounis, C. A. An efficient algorithm for large-scale  
10 detection of protein families. *Nucleic Acids Res.* **30**, 1575-1584 (2002).

11 23 Katoh, K., Asimenos, G. & Toh, H. Multiple alignment of DNA sequences with MAFFT.  
12 *Methods Mol. Biol.* **537**, 39-64 (2009).

13 24 Castresana, J. Selection of conserved blocks from multiple alignments for their use in  
14 phylogenetic analysis. *Mol. Biol. Evol.* **17**, 540-552 (2000).

15 25 Darriba, D., Taboada, G. L., Doallo, R. & Posada, D. ProtTest 3: fast selection of best-fit  
16 models of protein evolution. *Bioinformatics* **27**, 1164-1165 (2011).

17 26 Stamatakis, A. RAxML-VI-HPC: Maximum likelihood-based phylogenetic analyses with  
18 thousands of taxa and mixed models. *Bioinformatics* **22**, 2688-2690 (2006).

19 27 Tamura, K., Stecher, G., Peterson, D., Filipski, A. & Kumar, S. MEGA6: Molecular  
20 Evolutionary Genetics Analysis Version 6.0. *Mol. Biol. Evol.* **30**, 2725-2729 (2013).

21 28 Padovan, A. C. B., Sanson, G. F. O., Brunstein, A. & Briones, M. R. S. Fungi evolution  
22 revisited: Application of the penalized likelihood method to a bayesian fungal phylogeny  
23 provides a new perspective on phylogenetic relationships and divergence dates of  
24 ascomycota groups. *J. Mol. Evol.* **60**, 726-735 (2005).

25 29 Felsenstein, J. Inferring phylogenies from protein sequences by parsimony, distance, and  
26 likelihood methods. *Method. Enzymol.* **266**, 418-427 (1996).

27 30 Yin, Y. B. *et al.* dbCAN: a web resource for automated carbohydrate-active enzyme  
28 annotation. *Nucleic Acids Res.* **40**, W445-W451 (2012).

29 31 Zhao, Z. T., Liu, H. Q., Wang, C. F. & Xu, J. R. Comparative analysis of fungal genomes  
30 reveals different plant cell wall degrading capacity in fungi. *Bmc Genomics* **14**, 274  
31 (2013).

32 32 Rytioja, J. *et al.* Plant-Polysaccharide-Degrading Enzymes from Basidiomycetes.  
33 *Microbiol. Mol. Biol. R.* **78**, 614-649 (2014).

34 33 Kubicek, C. P., Starr, T. L. & Glass, N. L. Plant cell wall-degrading enzymes and their  
35 secretion in plant-pathogenic fungi. *Annu. Rev. Phytopathol.* **52**, 427-451 (2014).

36 34 Murphy, C., Powlowski, J., Wu, M., Butler, G. & Tsang, A. Curation of characterized  
37 glycoside hydrolases of fungal origin. *Database : the journal of biological databases and*  
38 *curation* **2011**, bar020 (2011).

39 35 Choi, J., Kim, K. T., Jeon, J. & Lee, Y. H. Fungal plant cell wall-degrading enzyme  
40 database: a platform for comparative and evolutionary genomics in fungi and Oomycetes.  
41 *Bmc Genomics* **14**, S7 (2013).

42 36 Petersen, T. N., Brunak, S., von Heijne, G. & Nielsen, H. SignalP 4.0: discriminating  
43 signal peptides from transmembrane regions. *Nat. Methods* **8**, 785-786 (2011).

44 37 Krogh, A., Larsson, B., von Heijne, G. & Sonnhammer, E. L. Predicting transmembrane

1 protein topology with a hidden Markov model: application to complete genomes. *J. Mol.*  
2 *Biol.* **305**, 567-580 (2001).

3 38 Emanuelsson, O., Nielsen, H., Brunak, S. & von Heijne, G. Predicting subcellular  
4 localization of proteins based on their N-terminal amino acid sequence. *J. Mol. Biol.* **300**,  
5 1005-1016 (2000).

6 39 Fankhauser, N. & Maser, P. Identification of GPI anchor attachment signals by a Kohonen  
7 self-organizing map. *Bioinformatics* **21**, 1846-1852 (2005).

8 40 Horton, P. *et al.* WoLF PSORT: protein localization predictor. *Nucleic Acids Res.* **35**,  
9 W585-587 (2007).

10 41 Emanuelsson, O., Brunak, S., von Heijne, G. & Nielsen, H. Locating proteins in the cell  
11 using TargetP, SignalP and related tools. *Nat. Protoc.* **2**, 953-971 (2007).

12 42 Rawlings, N. D., Waller, M., Barrett, A. J. & Bateman, A. MEROPS: the database of  
13 proteolytic enzymes, their substrates and inhibitors. *Nucleic Acids Res.* **42**, D503 (2014).

14 43 Ohm, R. A. *et al.* Diverse lifestyles and strategies of plant pathogenesis encoded in the  
15 genomes of eighteen *Dothideomycetes* fungi. *PLoS Pathog.* **8**, e1003037 (2012).

16 44 Khaldi, N. *et al.* SMURF: Genomic mapping of fungal secondary metabolite clusters.  
17 *Fungal Genet. Biol.* **47**, 736-741 (2010).

18 45 Blin, K. *et al.* antiSMASH 2.0-a versatile platform for genome mining of secondary  
19 metabolite producers. *Nucleic Acids Res.* **41**, W204-W212 (2013).

20  
21
